# Supplementary material for: Benzylsuccinate Synthase is Post-Transcriptionally Regulated in the Toluene-Degrading Denitrifier Magnetospirillum sp. Strain 15-1
Source: PubMed Central journal article supplement (PMC7285207; doi:10.3390/microorganisms8050681), 2020-05-07
Supplement: microorganisms-08-00681-s001.pdf [file microorganisms-08-00681-s001.pdf]

Article

# Benzylsuccinate synthase is post-transcriptionally regulated in the toluene-degrading denitrifier *Magnetospirillum* sp. strain 15-1

Ingrid Meyer-Cifuentes<sup>1,2</sup>, Sylvie Gruhl<sup>1</sup>, Sven-Bastiaan Haange<sup>3</sup>, Vanessa Lünsmann<sup>3</sup>, Nico Jehmlich<sup>3</sup>, Martin von Bergen<sup>3,4</sup>, Hermann J. Heipieper<sup>1\*</sup>, Jochen A. Müller<sup>1</sup>

<sup>1</sup> Department of Environmental Biotechnology, Helmholtz Centre for Environmental Research - UFZ, Permoserstr. 15, 04318 Leipzig, Germany; [ingrid.meyer.cifuentes@dsmz.de](mailto:ingrid.meyer.cifuentes@dsmz.de) (I.M.-C.) [sylvie.gruhl@outlook.de](mailto:sylvie.gruhl@outlook.de) (S.G.), [jochen.mueller@ufz.de](mailto:jochen.mueller@ufz.de) (J.A.M)

<sup>2</sup> Junior Research Group of Microbial Biotechnology, Leibniz Institute DSMZ, German Collection of Microorganisms and Cell Cultures, Inhoffenstr. 7B, 38124 Braunschweig, Germany

<sup>3</sup> Department of Molecular Systems Biology Helmholtz Centre for Environmental Research - UFZ, Permoserstr. 15, 04318 Leipzig, Germany; [sven.haange@ufz.de](mailto:sven.haange@ufz.de) (S.-B.H.), [vanessa.luensmann@posteo.de](mailto:vanessa.luensmann@posteo.de) (V.L.), [nico.jehmlich@ufz.de](mailto:nico.jehmlich@ufz.de) (N.J.)

<sup>4</sup> Group of Functional Proteomics, Institute of Biochemistry, Faculty of Biosciences, Pharmacy and Psychology University of Leipzig, Talstrastr. 33, 04103 Leipzig, Germany; [martin.vonbergen@ufz.de](mailto:martin.vonbergen@ufz.de)

\* Correspondence: [hermann.heipieper@ufz.de](mailto:hermann.heipieper@ufz.de); Tel.: +49-341-2351694.

**Keywords:** toluene, nitrate, benzylsuccinate synthase, *Magnetospirillum*, rhizosphere

---

# 1. Supplemental Figures and Tables

(a)

(a.1)

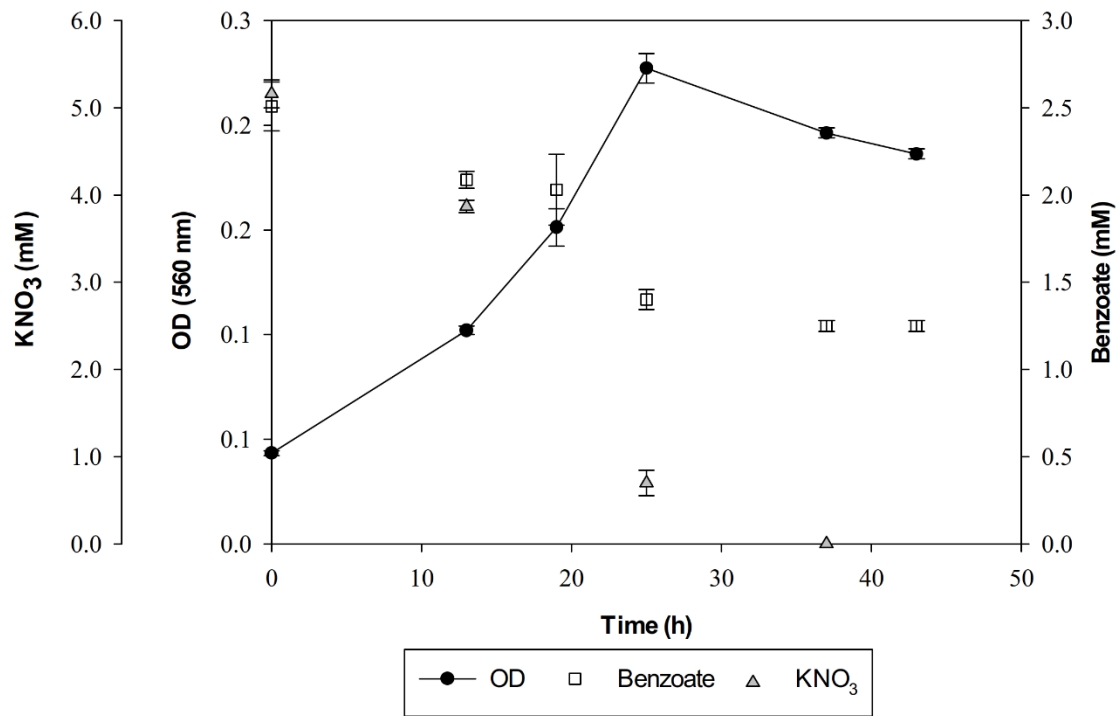

(a.2)

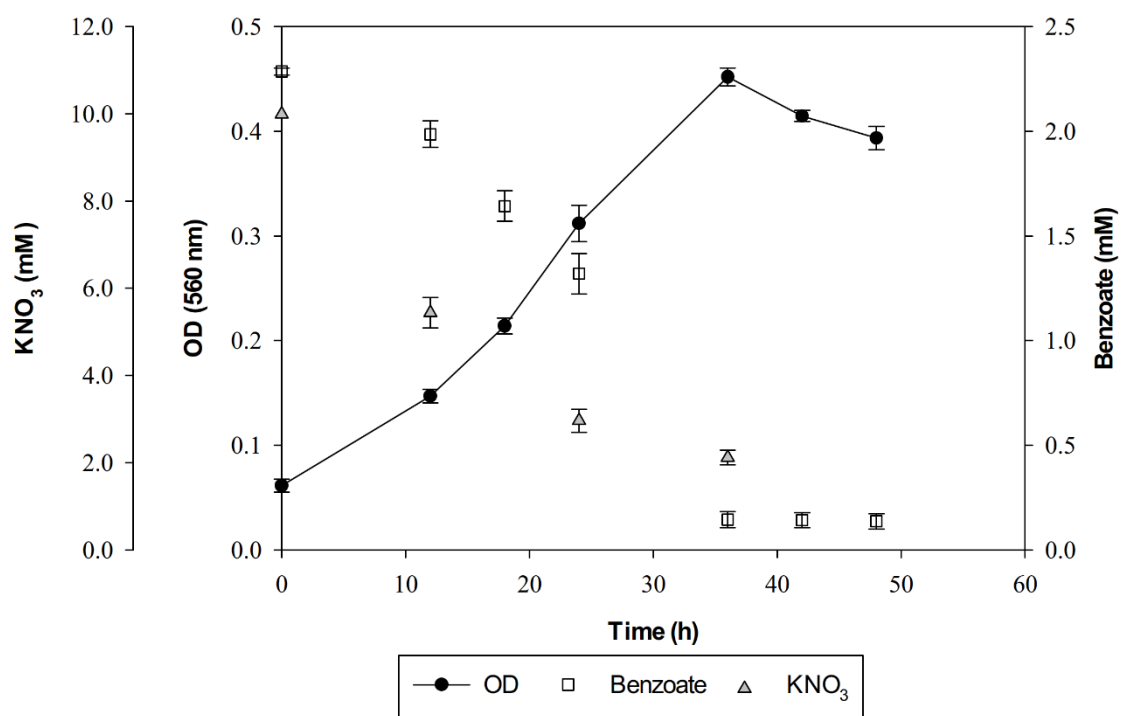

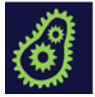

1 (b)

(b.1)

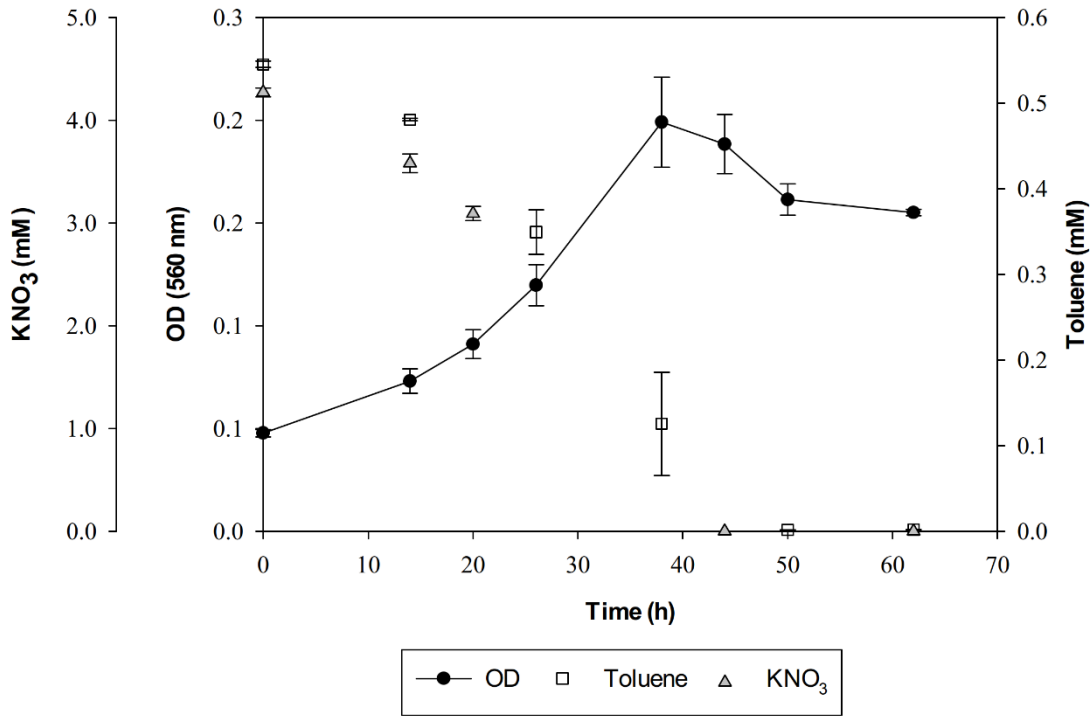

2

3

(b.2)

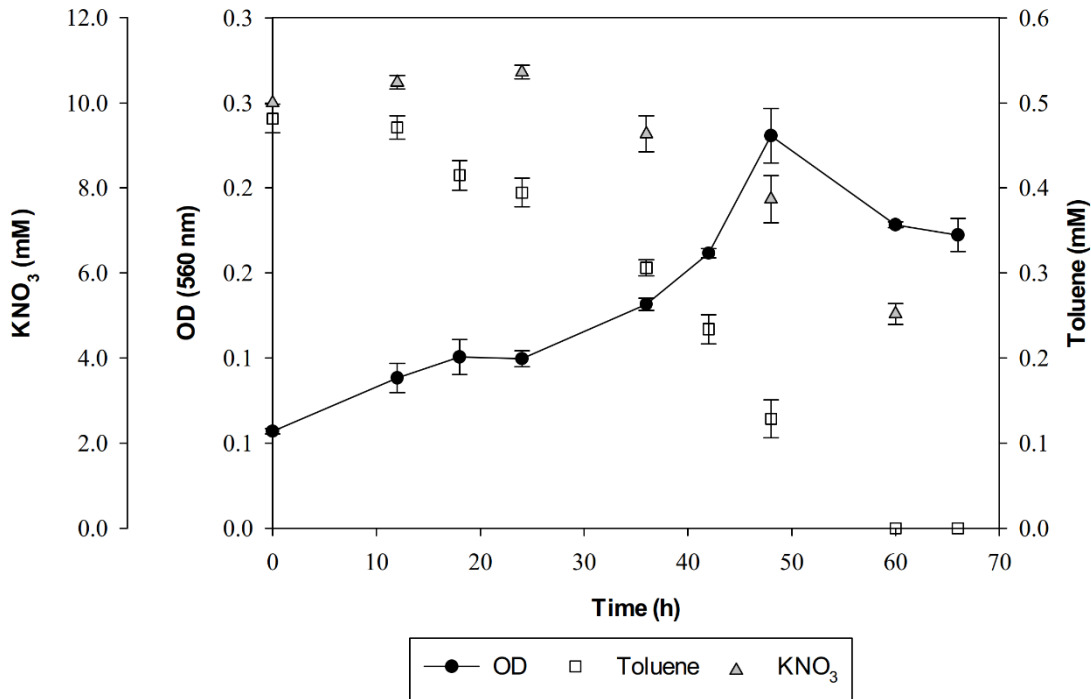

4

5

6

7

(c)

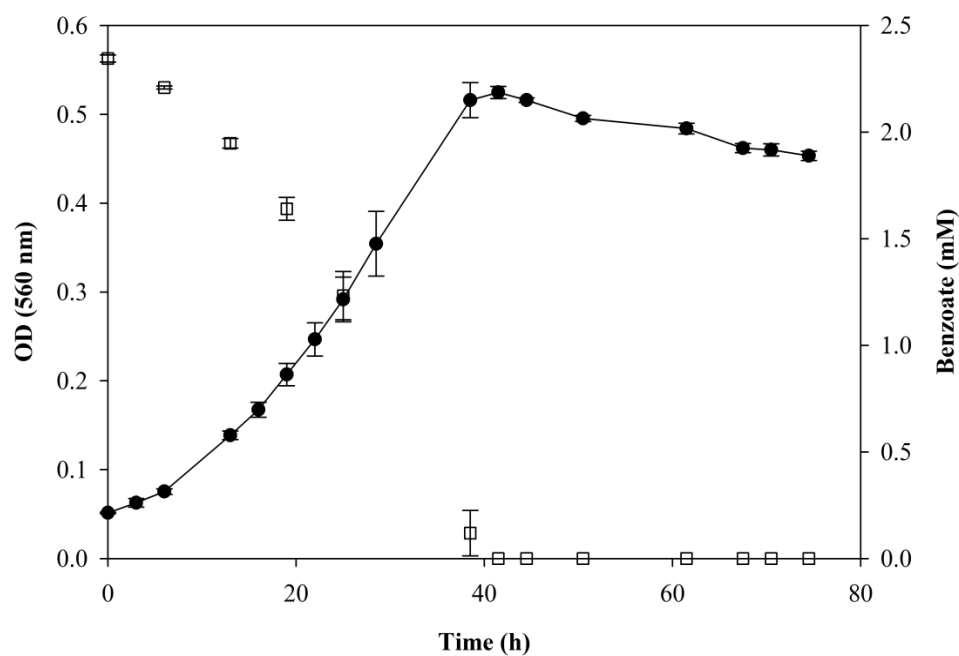

8

9 **Figure S1:** Growth of *Magnetospirillum* sp. 15-1 at different conditions. Growth of *Magnetospirillum* sp. 15-1 with:  
 10 (a) 2.5 mM benzoate as the sole carbon source, 5 mM (a.1) and 10 mM KNO<sub>3</sub> (a.2) under anoxic conditions; (b)  
 11 0.5 mM toluene as the sole carbon source, 5 mM (b.1) and 10 mM KNO<sub>3</sub> (b.2) under anoxic conditions; (c) 2.5  
 12 mM benzoate as the sole carbon source under oxic conditions. Nitrite was below detection limits in each culture.  
 13  $\Delta$ : Nitrate consumption;  $\bullet$ : optical density;  $\square$ : carbon source degradation.

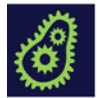

14  
15  
16

Table S1: Identity (%) of proteins involved in anaerobic toluene degradation among different degraders to *Magnetospirillum* sp. 15-1<sup>a</sup>.

| Protein | <i>Magnetospirillum</i> sp.<br>TS-6<br>AB167725.1 | <i>Azoarcus toluolyticus</i><br>ATCC 51758<br>NZFTMD01000027.1 | <i>Azoarcus toluclasticus</i><br>ATCC 700605<br>ARJX01.1 | <i>Azoarcus</i> sp.<br>CIB<br>DQ988527.1 | <i>Azoarcus</i> sp. EbN1<br>NC006513 | <i>Thauera aromatica</i><br>K172<br>CP028339.1 | <i>Herminiimonas</i> sp. CN<br>AVCC00000000.1 | <i>Desulfobacula toluolica</i> Tol2<br>NC018645 | <i>Geobacter metallireducens</i><br>GS-15<br>CP000148 |
|---------|---------------------------------------------------|----------------------------------------------------------------|----------------------------------------------------------|------------------------------------------|--------------------------------------|------------------------------------------------|-----------------------------------------------|-------------------------------------------------|-------------------------------------------------------|
| BssD    | 98.8                                              | 65.6                                                           | 64.7                                                     | 65.6                                     | 62.8                                 | 62.2                                           | 63.1                                          | 57.5                                            | 48.2                                                  |
| BssC    | 98.3                                              | 62.7                                                           | 61                                                       | 61                                       | 63.8                                 | 62.1                                           | 58.6                                          | 55.2                                            | 56.9                                                  |
| BssA    | 99.8                                              | 83.9                                                           | 83.6                                                     | 82.5                                     | 81.8                                 | 80.6                                           | 85.5                                          | 76.2                                            | 74.1                                                  |
| BssB    | 100                                               | 69                                                             | 72.3                                                     | 68.7                                     | 73.3                                 | 74.7                                           | 65.5                                          | 53.6                                            | 56.3                                                  |
| BssE    | 98.6                                              | 79.2                                                           | 79.2                                                     | 79.2                                     | 81.7                                 | 79.6                                           | 82.1                                          | 67.7                                            | 64.5                                                  |
| BssF    |                                                   | 60.7                                                           | 59.6                                                     | 61.3                                     | 61.4                                 | 63.6                                           | 63                                            | 51.9                                            | 48.1                                                  |
| BssG    |                                                   | 51.6                                                           | 51.6                                                     | 51                                       | 52.9                                 | 51.8                                           | 54.7                                          |                                                 |                                                       |
| BssI    |                                                   | 50.8                                                           |                                                          | 50.3                                     |                                      |                                                | 47.7                                          |                                                 |                                                       |
| BssJ    |                                                   | 64.9                                                           | 61.7                                                     | 64.9                                     | 63.6                                 | 63                                             | 58.9                                          |                                                 |                                                       |
| BssK    |                                                   | 54.8                                                           | 69.1                                                     | 54.8                                     | 56.7                                 | 58.9                                           | 55                                            |                                                 |                                                       |
| BssL    |                                                   | 48.5                                                           | 48.7                                                     | 49                                       | 48.7                                 | 50.1                                           | 51.7                                          |                                                 |                                                       |
| XylR    |                                                   |                                                                |                                                          |                                          |                                      |                                                |                                               |                                                 | 41.8                                                  |

|              |      |      |      |      |      |      |      |      |
|--------------|------|------|------|------|------|------|------|------|
| <b>TdiR</b>  |      | 63.5 | 63.5 | 63.2 | 59.8 | 65.2 |      |      |
| <b>TdiS</b>  | 52.3 |      | 58.3 | 58.9 | 58.5 | 58.9 |      |      |
| <b>Ycf48</b> |      | 34   |      |      |      |      |      |      |
| <b>Ydfj</b>  |      | 49.5 |      |      |      |      |      |      |
| <b>BbsH</b>  | 82.1 | 81.3 | 79.4 | 79.8 | 80.2 | 79.8 | 72   | 72   |
| <b>BbsG</b>  | 77.6 | 77.1 | 77.4 | 78.4 | 77.4 | 75.2 | 69.9 | 71.6 |
| <b>BbsF</b>  | 73.2 | 74.6 | 73.7 | 74.4 | 74.6 | 75.6 | 67.5 | 71   |
| <b>BbsE</b>  | 69.7 | 71.8 | 69.4 | 70.6 | 70.4 | 72.8 | 63.3 | 64.9 |
| <b>BbsD</b>  | 74.3 | 72.3 | 73.9 | 73.9 | 73.9 | 75.1 | 67.1 | 68.3 |
| <b>BbsC</b>  | 44   | 43.7 | 44.8 | 44   | 44   | 45.2 | 42.9 | 39.6 |
| <b>BbsB</b>  | 84.4 | 84.6 | 84.6 | 85.4 | 85.6 | 83.1 | 73.1 | 74.4 |
| <b>BbsA</b>  | 74.5 | 74.5 | 73.8 | 71.1 | 74.5 | 72.8 | 61.8 | 66.2 |

17 <sup>a</sup> ClustalW 2.1 alignment; Cost Matrix: BLOSUM62; Gap open cost:10; Gap extend cost: 0.1

18

19

20

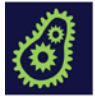

21 (a)

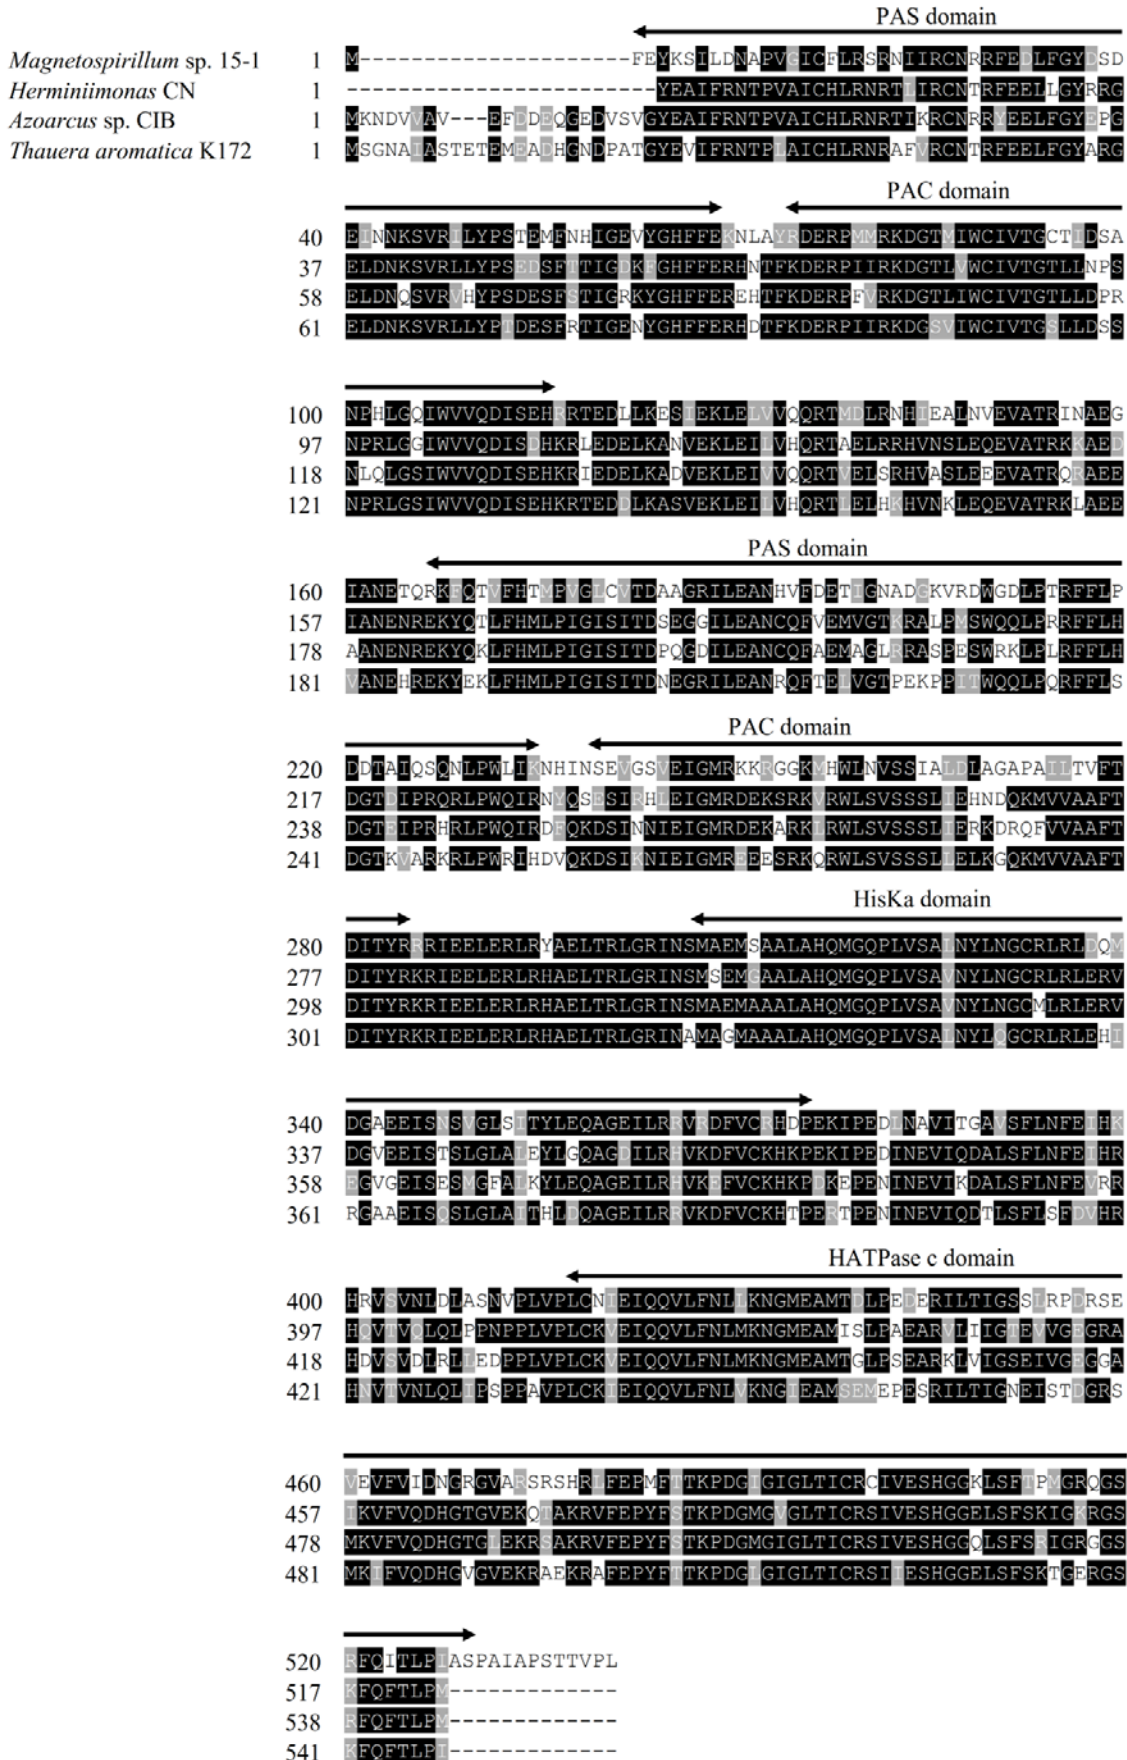

22  
23  
24  
25  
26  
27  
28

29

30 (b)

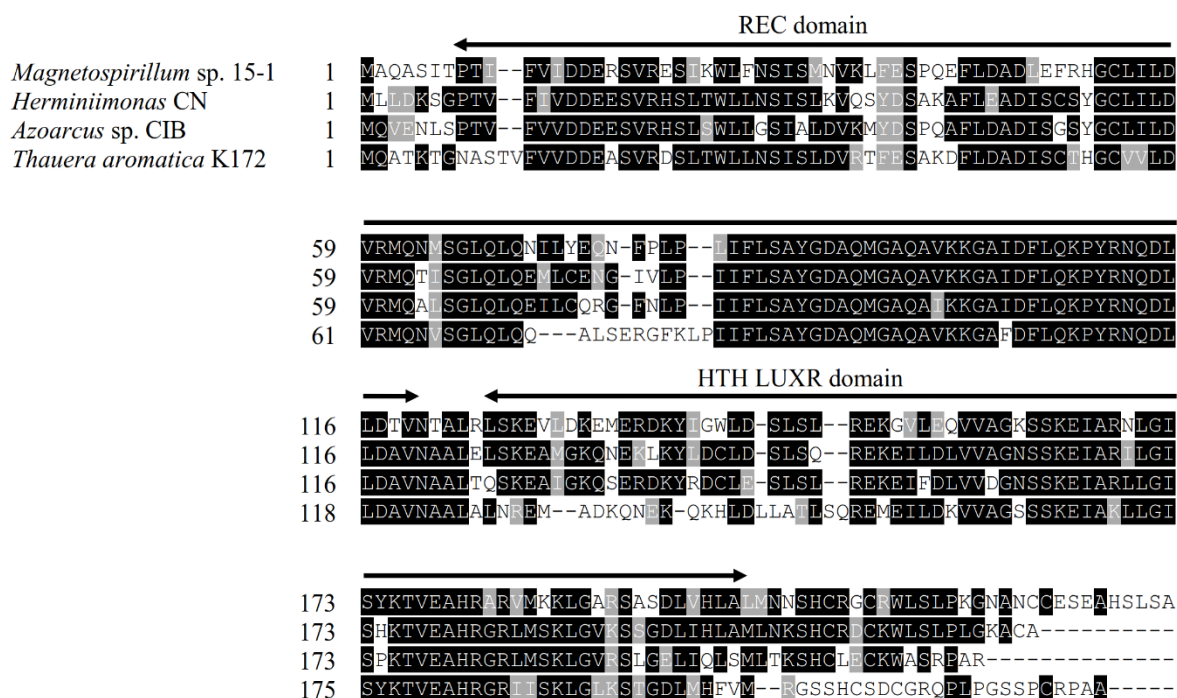

31

32

33 **Figure S2:** Pairwise alignment of TdiS and TdiR proteins among anaerobic toluene degraders. The alignment of  
 34 TdiS (a) and TdiR (b) are shown for four different toluene degraders. Shaded background represents the  
 35 similarity of the aminoacidic residue between the different aminoacidic sequences. Arrows placed above the first  
 36 aminoacidic sequence highlights conserved protein domain.



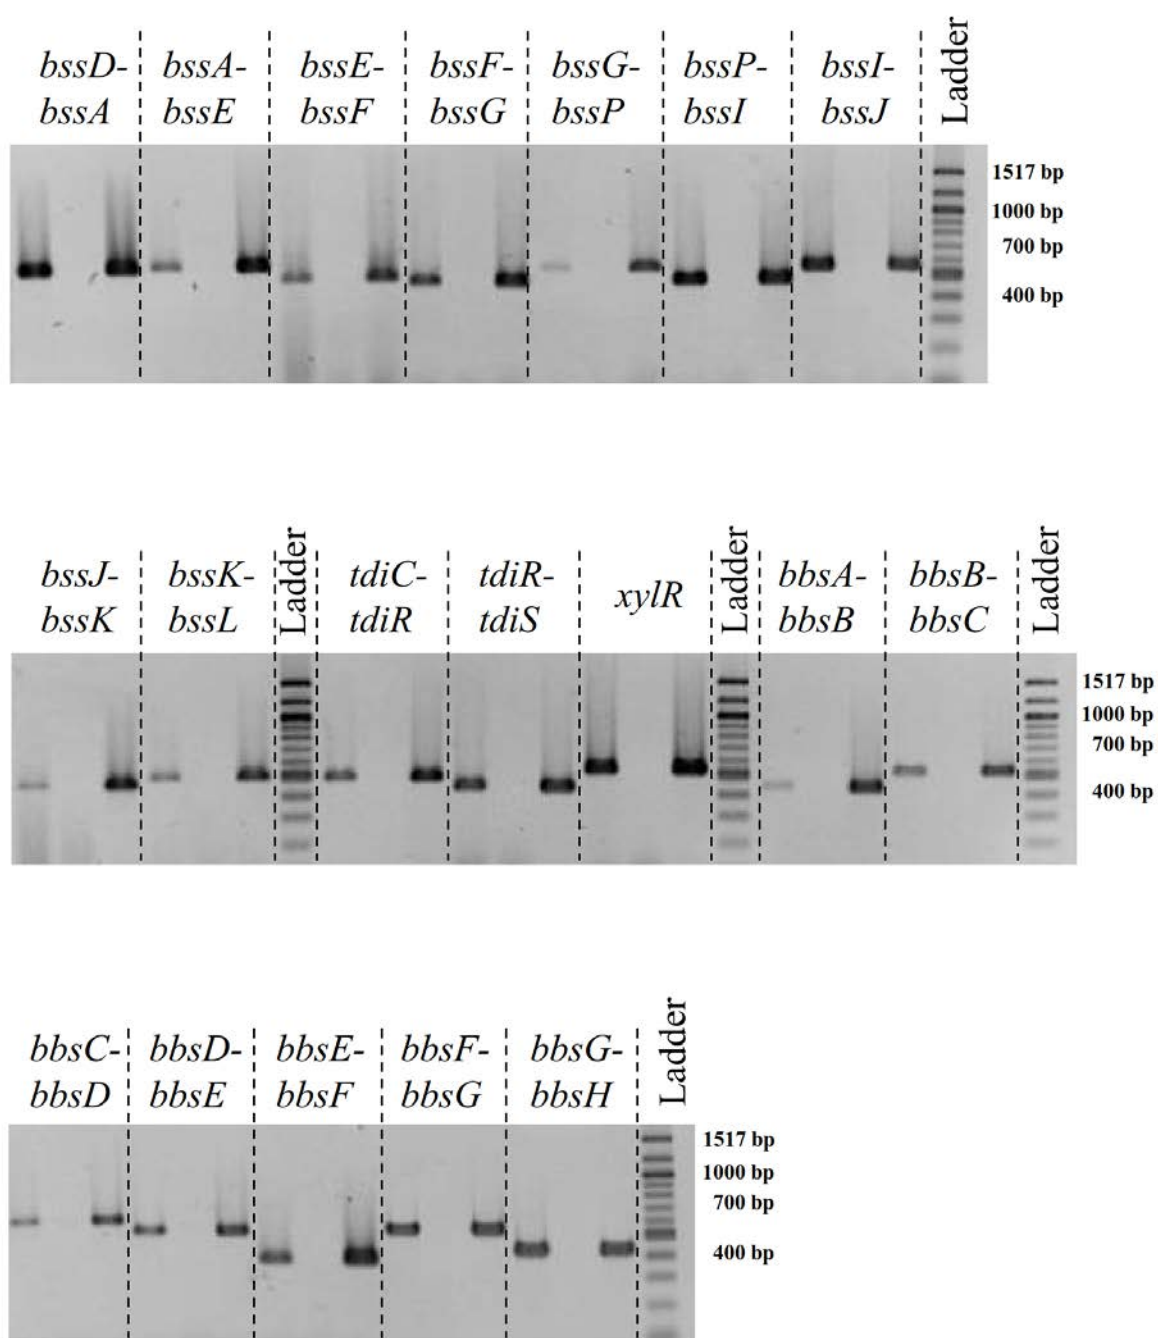

37

38

39

40 **Figure S3:** Transcriptional organization of *bss*, *tdi*, and *bbs* genes. The three lanes per target sequence region show  
 41 results of RT-PCR assays with: From left to right, (i) RNA as template and with RT, (ii) with RNA as template  
 42 but without RT (negative control), and (iii) with genomic DNA (positive control).

43

44 **Data Set S1:** qPCR raw data of *bssA*, *bcrC* and 16S rRNA from AN and AB cultures.

45 **Data Set S2:** Copy numbers of *bssA*, *bcrC* and 16S rRNA from AN and AB cultures.

46



47 **Table S2:** Detection of CRP/FNR superfamily members. Regulation of each protein is indicated (log2 fold) and their significance (p-value) in anaerobic and aerobic cultures. AN\_T  
 48 represents cultures growing anaerobically with toluene and either 2.5 mM (AN\_T2.5), 5 mM (AN\_T5), or 10 mM (AN\_T10) of KNO<sub>3</sub>. AB\_T represents cultures growing aerobically  
 49 with benzoate and supplied additionally with either toluene alone (AB\_T) or toluene and 5 mM of KNO<sub>3</sub> (AB\_TN).

| Gene              | Locus         | Anaerobic cultures |         |        |         |        |         | Aerobic cultures |         |        |         |
|-------------------|---------------|--------------------|---------|--------|---------|--------|---------|------------------|---------|--------|---------|
|                   |               | log2               | p-value | log2   | p-value | log2   | p-value | log2             | p-value | log 2  | p-value |
|                   |               | AN_T2.5            | AN_T2.5 | AN_T5  | AN_T5   | AN_T10 | AN_T10  | AB_T             | AB_T    | AB_TN  | AB_TN   |
| contig01_gene37   | 39763-40416   | ND                 | ND      | ND     | ND      | ND     | ND      | ND               | ND      | ND     | ND      |
| contig01_gene283  | 296369-295611 | -0.123             | 0.797   | -1.353 | 0.172   | -1.213 | 0.099   | ND               | ND      | ND     | ND      |
| contig01_gene551  | 568946-569650 | -0.861             | 0.022   | -0.331 | NC      | -0.178 | 0.724   | ND               | ND      | ND     | ND      |
| contig04_gene2311 | 291845-292429 | ND                 | ND      | ND     | ND      | ND     | ND      | ND               | ND      | ND     | ND      |
| contig04_gene2534 | 518994-519695 | -0.307             | 0.358   | -0.344 | 0.588   | -0.323 | 0.211   | -0.230           | 0.604   | 0.611  | 0.643   |
| contig06_gene3113 | 217618-218352 | ND                 | ND      | ND     | ND      | ND     | ND      | ND               | ND      | ND     | ND      |
| contig07_gene3349 | 117592-116894 | -0.048             | 0.847   | 0.065  | 0.724   | -0.226 | 0.439   | 0.355            | 0.642   | 0.882  | 0.135   |
| contig07_gene3350 | 118295-117597 | -0.056             | 0.900   | -0.231 | 0.267   | -1.105 | 0.028   | 0.054            | NC      | 0.088  | NC      |
| contig09_gene3888 | 164717-165376 | ND                 | ND      | ND     | ND      | NC     | NC      | ND               | ND      | ND     | ND      |
| contig09_gene3893 | 170577-169882 | -0.410             | 0.612   | -0.953 | NC      | -1.182 | 0.050   | ND               | ND      | ND     | ND      |
| contig10_gene4043 | 99521-96201   | -1.371             | NC      | -0.788 | NC      | 0.605  | NC      | 0.206            | NC      | 0.558  | NC      |
| contig10_gene4044 | 96209-97012   | 2.421              | 0.073   | ND     | ND      | -1.268 | NC      | -0.381           | NC      | -0.471 | NC      |

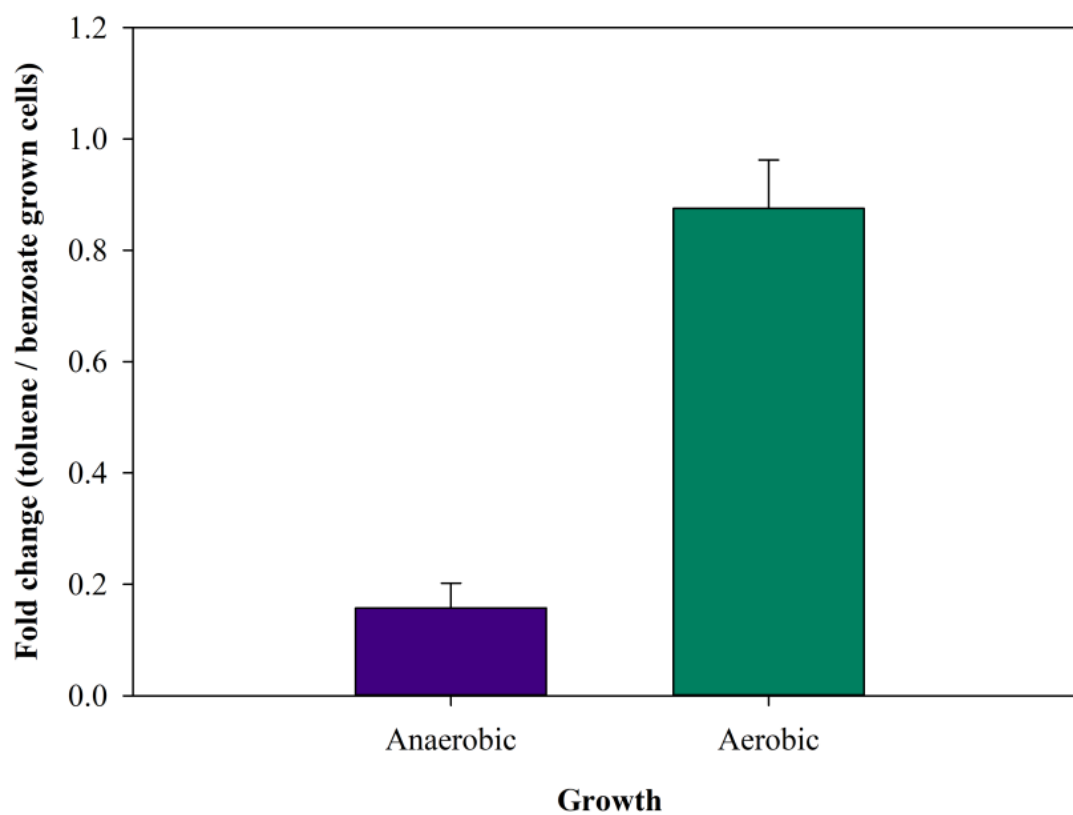

51

52 **Figure S4:** Fold change averages of *bcrC* expression in anaerobic and aerobic cultures of *Magnetospirillum* sp 15-  
 53 1. AN cultures growing with 2.5 mM, 5 mM, or 10 mM of KNO<sub>3</sub> are shown as “Anaerobic” and AB cultures  
 54 growing in the presence of toluene and toluene/nitrate are shown as “Aerobic”.

55

56 **Data Set S3:** Proteins identification and abundances from AN and AB cultures.

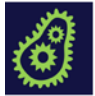

57  
58  
59  
60  
61  
62  
63  
64  
65  
66  
67  
68  
69  
70  
71

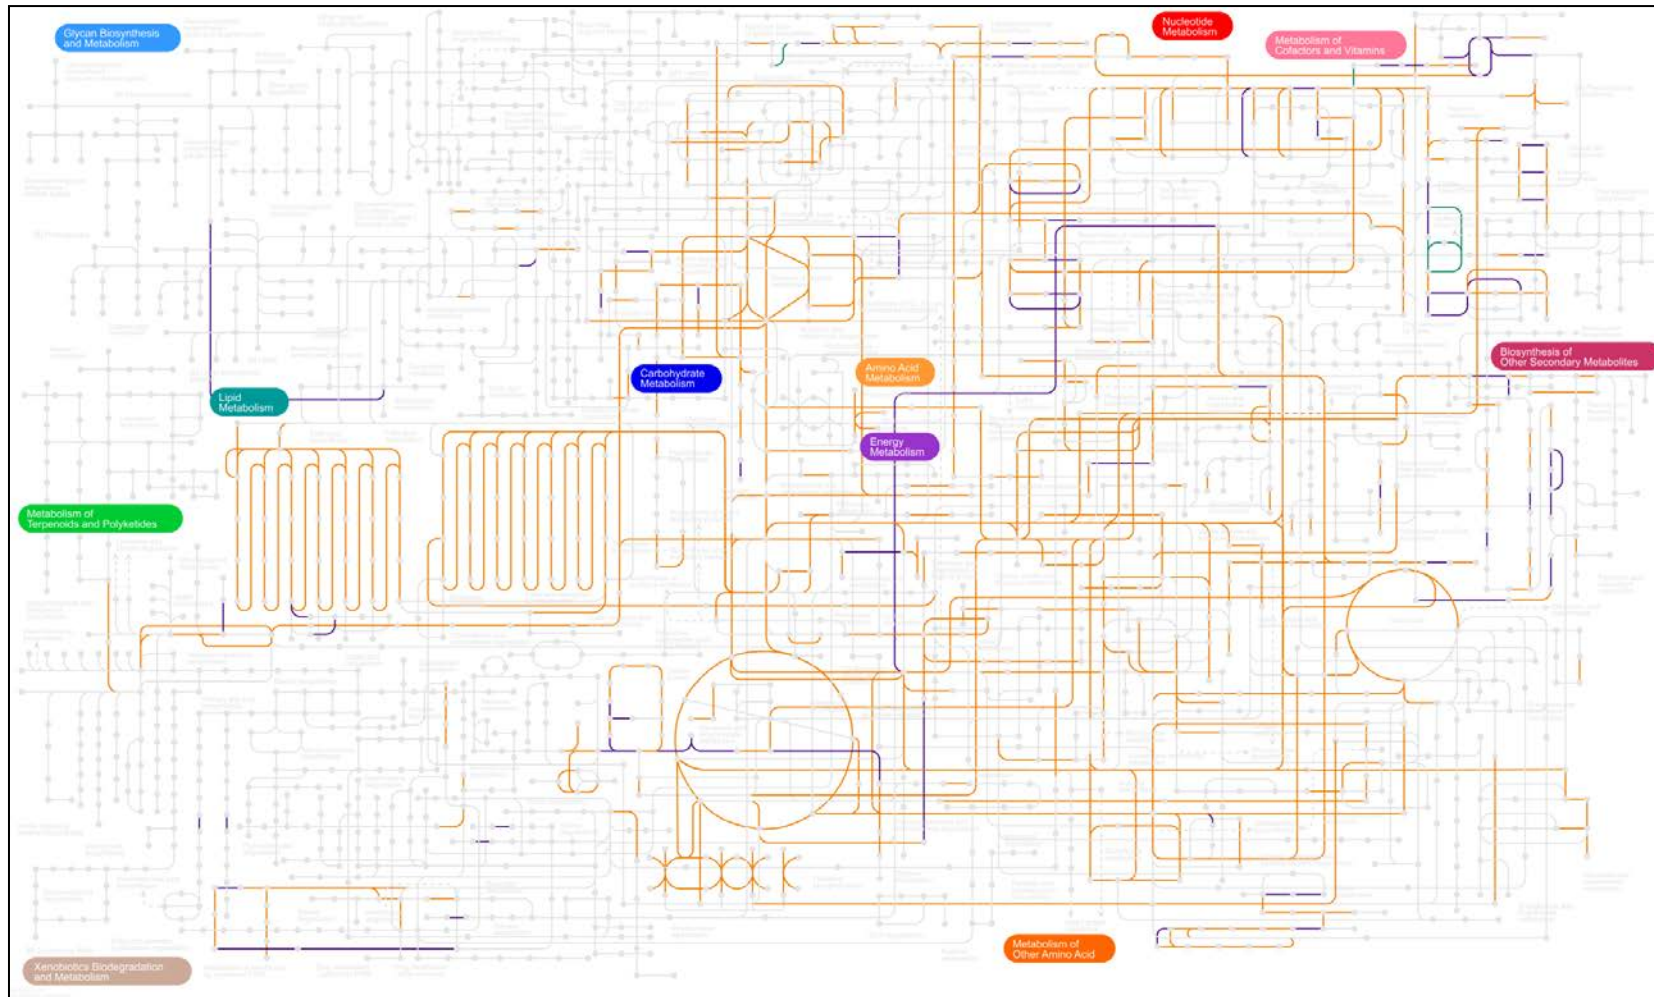

72 **Figure S5: Metabolic pathways detected in anaerobic and aerobic cultures of *Magnetospirillum* sp. 15-1.** KEGG pathways mapping shows pathways unique to AN cells (purple),  
73 unique to AB cells (green), and shared between both conditions (orange).

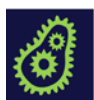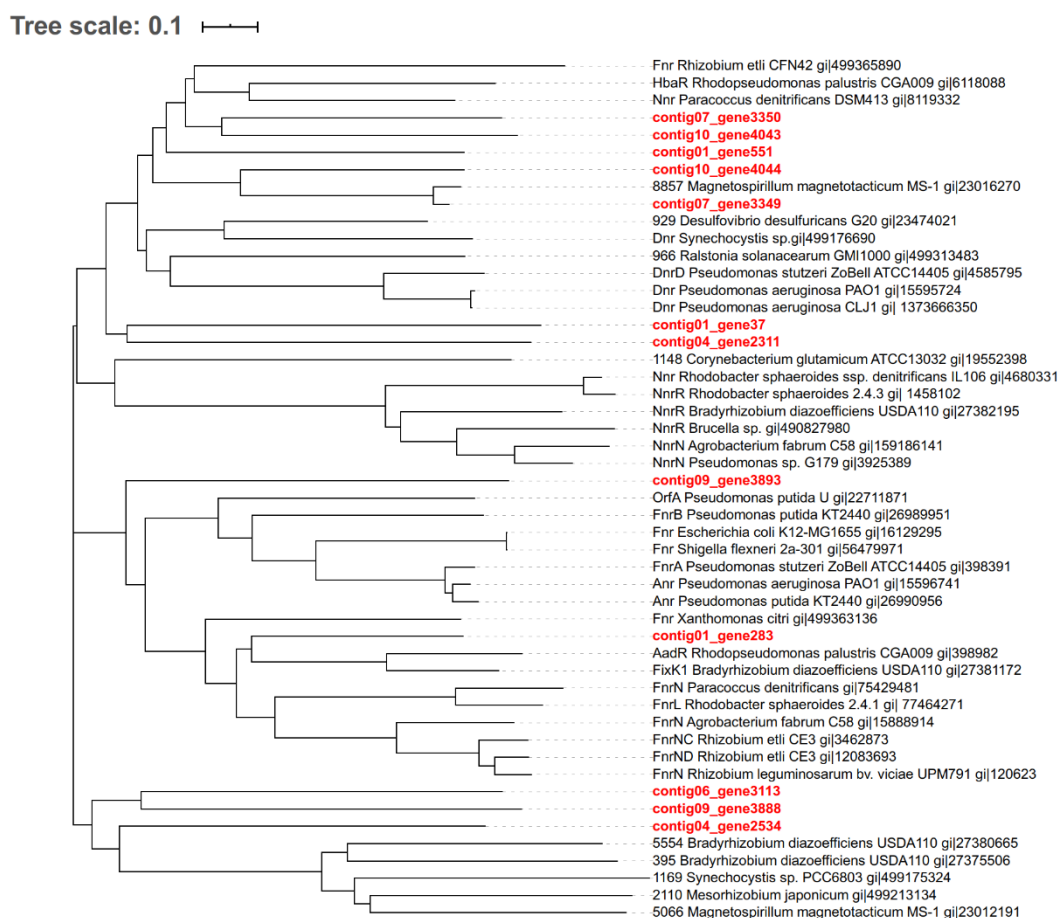

75

76 **Figure S6:** Phylogenetic tree of CRP/FNR regulators. Aminoacidic sequences were obtained from the genome of  
77 *Magnetospirillum* sp. 15-1 (shown in red) and other amino acid sequences from the NCBI database. Dnr, Fnr, Nnr  
78 and C represent branches of the family and their inducers and/or repressors are shown (NO, O<sub>2</sub>). The  
79 phylogenetic relationship was conducted with the Neighbor-Joining method (1000 bootstrap replicates). The tree  
80 scale represents amino acids substitution per site.

81

## 82 2. Supplemental Materials and Methods

### 83 2.1. Benzoate detection

84 Degradation of benzoate was quantified through a gradient HPLC with a UV detection of 228  
85 nm. Benzoate was separated from other compounds with a LiChrospher 100 RP-18e (5 μm),  
86 LiChroCART 125-4, column. Methanol at 100 % (Rotisolvy HPLC Gradient Grade 99 %, Carl Roth,  
87 Karlsruhe, BW, Germany) and phosphoric acid at 0.1 % (Chemsolute for analysis 85 %, Th. Geyer,  
88 Höxter, NW, Germany) were used as eluents of the mobile phase. Methanol was increased from 20  
89 to 100% until minute 20 and remained constant for 5 min. Then methanol was decreased again to 20%  
90 and remained constant for 3 min. The flow rate was set at 0.5 mL/ min. Quantification was performed  
91 by using calibration curves.

## 92 2.2. RNA quality and purity analysis

93 To assess the quality of total RNA from each elute, 1  $\mu\text{L}$  of sample was measured by Nanodrop  
 94 (Nanodrop ND-1000 Spectrophotometer, Thermo Fisher Scientific, Waltham, MA, USA) to determine  
 95 purity by 260/230 ratios and to check contaminants such as guanidine salts and phenol. To analyse  
 96 RNA quality, 5  $\mu\text{L}$  of each RNA elute was run in a 1.2 % agarose gel for 45 min at 90 v.

97 To test for DNA residuals within the samples, 1  $\mu\text{L}$  of each elute was subjected to PCR  
 98 amplification with a HotStar Taq  $\text{\textcircled{R}}$  according to manufacturer's instructions and by using the  
 99 universal primers 27F and 1492R. Then, 5  $\mu\text{L}$  of each amplicon was run in a 1.2 % agarose gel for 30  
 100 min at 100 V.

101

## 102 2.3. cDNA synthesis

103 Total RNA (150 ng) was used to synthesize cDNA through reverse transcriptase technique using  
 104 the Ominiscript $\text{\textcircled{R}}$  Reverse Transcription Kit (Qiagen, Hilden, NW, Germany). First, the RNA samples  
 105 were dissolved each in RNase free-water to make 12.75  $\mu\text{L}$  and incubated for 10 min at 65  $^{\circ}\text{C}$  to  
 106 denature RNA secondary structure. Then a master mix was prepared and each reaction consisted of  
 107 2  $\mu\text{L}$  10x buffer RT, 2  $\mu\text{L}$  dNTP mix (5 mM each), 2  $\mu\text{L}$  random hexamer primers (10  $\mu\text{M}$ ), 1  $\mu\text{L}$  RNase  
 108 inhibitor (10 units/ $\mu\text{L}$ ) and 1  $\mu\text{L}$  Ominiscript Reverse Transcriptase. Negative controls without the  
 109 reverse transcriptase (NRTs) enzyme were prepared per each sample. Each reaction had a final  
 110 volume of 20  $\mu\text{L}$ . cDNA synthesis was performed by incubating the samples at 37  $^{\circ}\text{C}$  for 60 min.  
 111 Samples were then stored at -20  $^{\circ}\text{C}$  until usage.

## 112 2.4. Preparation of the *bssA*, *bcrC* and 16S rRNA standards for qPCR

113 The genes *bssA*, *bcrC* and 16S rRNA were amplified by PCR from extracted DNA of 15-1 cells  
 114 growing exponentially with toluene. The primer pairs used for amplification are shown in Table 1.  
 115 The PCR reaction consisted of 12.5  $\mu\text{L}$  HotStarTaq Master Mix 2x (Qiagen, Hilden, NW, Germany), 1  
 116  $\mu\text{L}$  of each primer (0.4  $\mu\text{M}$  final concentration), 9.5  $\mu\text{L}$  of RNase free-water and 1  $\mu\text{L}$  template. The  
 117 amplicons were further run in an 1.2% agarose gel and subsequently purified using the Qiagen  
 118 QIAquick PCR purification kit (Qiagen, Hilden, NW, Germany) according to the manufacturer's  
 119 instructions. The concentration of the purified DNA was measured with a Nanodrop (Nanodrop ND-  
 120 1000 Spectrophotometer, Thermo Fisher Scientific, Waltham, MA, USA). Based on the concentration,  
 121 the number of gene copies per  $\mu\text{L}$  was calculated with the following equation (eq.1):

122

$$123 \frac{\text{Copies}}{\mu\text{L}} = \frac{\text{PCR product} \left( \frac{\text{ng}}{\mu\text{L}} \right) \cdot 10e^{-9}}{\left( \text{Length PCR product [bp]} \cdot 660 \left[ \frac{\text{Da}}{\text{bp}} \right] \right) \cdot 6.022 \cdot 10e^{23}} \quad (\text{eq. 1})$$

124

125 660 Da/bp: Mass of double- stranded DNA; 6.022  $\cdot 10e^{23}$ : Avogadro constant

## 126 2.5. qPCR reaction for the amplification of *bssA*, *bcrC* and 16S rRNA

127 The calibration curve for each gene was prepared by diluting serially the standards with RNase  
 128 free-water (Qiagen, Hilden, NW, Germany) from  $10^8$  to  $10^1$  copies/ $\mu\text{L}$ . cDNA templates were  
 129 undiluted or diluted 1:10 for aerobic and anaerobic experiments respectively. cDNA templates for  
 130 16S rRNA amplification were always diluted 1:10. Negative controls and qPCR blanks were not  
 131 diluted. To avoid degradation, the samples were kept on ice all time.

132 A PCR reaction consisted of: 6.25  $\mu\text{L}$  KAPA SYBR FAST, 4.75  $\mu\text{L}$  RNase free-water, 0.25  $\mu\text{L}$  of  
 133 each primer (Table 1) with a final concentration of 200 nM for the 16S\_F/16S\_R primer pairs and 500  
 134 nM for *bssA*\_F3/*bssA*\_R3 and 2*bcrC*\_F/2*bcrC*\_R primer pairs. For the amplification of *bssA* and *bcrC*  
 135 the amount of cDNA template used was 1.5  $\mu\text{L}$  and for 16S rRNA, 1.0  $\mu\text{L}$ . Amplification was  
 136 performed in a Step One Plus Real Time PCR System (Applied Biosystems, Thermo Fischer Scientific,  
 137 Waltham, MA, USA).

## 138 2.6. Gene expression analysis

139 The initial abundances (in 30 mL of culture) of *bssA*, *bcrC* and 16S rRNA transcripts were  
 140 obtained by calculating the amount of copies per  $\mu\text{L}$  (eq. 2) contained in 150 ng of RNA.

$$141 \frac{\text{Copies}}{\mu\text{L}} = \left[ \text{Quantity} \cdot \left( \frac{1 \text{ mL}}{\text{RNA}} \right) \cdot \left( \frac{l}{rt_i} \right) \cdot \left( \frac{rt_f}{cDNA} \right) \cdot DF \right] \quad (\text{eq. 2})$$

142  
 143 Quantity: qPCR copies/  $\mu\text{L}$ ; RNA : volume (mL) harvested for RNA extraction; l: elute ( $\mu\text{L}$ ) after RNA  
 144 extraction; rt: total RNA ( $\mu\text{L}$ ) used for cDNA synthesis; rt: final volume ( $\mu\text{L}$ ) of the reverse  
 145 transcription reaction; cDNA: cDNA ( $\mu\text{L}$ ) used for qPCR reaction; DF: dilution factor used in qPCR  
 146 reaction.  
 147

148  
 149 The calculated *bssA* and *bcrC* copies/ $\mu\text{L}$ , were further normalized by using the 16S rRNA gene  
 150 as the calibrator: the ratio between *bssA* or *bcrC* and the normalizer, 16S rRNA, was calculated. Fold  
 151 changes were calculated by obtaining the ratio between normalized *bssA* or *bcrC* values of toluene-  
 152 grown cells to normalized *bssA* or *bcrC* values of benzoate-grown cells (reference cultures) which are  
 153 subjected to the same oxygen conditions and nitrate concentrations (anaerobic cultures) e.g.  
 154 AN\_T2.5/AN\_B2.5, AN\_T5/AN\_B5, etc (Table S3).  
 155

156 **Table S3:** Culture pairs used to assess *bssA* and *bcrC* expression from toluene-grown cells relative to *bssA* and *bcrC* expression  
 157 from benzoate-grown cells.

| Anaerobic conditions |                     |                      |
|----------------------|---------------------|----------------------|
| Experiment           | Toluene-grown cells | Benzoate-grown cells |
| 1                    | AN_T2.5             | AN_B2.5              |
| 2                    | AN_T5               | AN_B5                |
| 3                    | AN_T10              | AN_B10               |
| Aerobic conditions   |                     |                      |
|                      | Toluene-grown cells | Benzoate-grown cells |
| 4                    | AB_T                | AB_B                 |
| 5                    | AB_TN               | AB_B                 |

158

## 159 2.7. Peptide detection by LC-MS

160 Purified peptides were dissolved in 20  $\mu\text{L}$  of acetonitrile (100%), incubated for 10 min at room  
 161 temperature and consecutively in an ultrasonic bath 3 x 10 s. Further, the samples were centrifuged  
 162 and the supernatants were transferred into 12 x 3 mm LC-MS glass vials (Waters Corporation,  
 163 Milford, CT, USA).

164 Peptides were then injected into a Nano-HPLC and trapped in a C18-reverse phase column  
 165 (Acclaim PepMap<sup>®</sup> 100, 75  $\mu\text{m}$  x 2 cm, particle size 3  $\mu\text{M}$ , nanoViper, Thermo Fisher Scientific,  
 166 Waltham, MA, USA) for 5 min. Peptide separation by a two-step gradient consisted in 90 min from  
 167 4% to 30% of B (B: 80% acetonitrile, 0.1 % formic acid in MS-grade water) and then 30 min from 30%  
 168 to 55% of B. The temperature of the separation column was set to 35 °C and the flow rate was 0.3  $\mu\text{L}$   
 169 /min.

170 The eluted peptides were later ionized and measured. The MS was set to a full MS/dd-MS<sup>2</sup> mode  
 171 scan with positive polarity. The full MS scan was adjusted to a MS resolution of 120,000, MS automatic  
 172 gain control (AGC) target of 3·10<sup>6</sup> ions, maximum injection time for MS of 80 ms and a scan range of  
 173 350 to 1550 m/z. The dd-MS<sup>2</sup> scan was set to a resolution of 15,000, AGC target of 2·10<sup>5</sup> ions, a  
 174 maximum injection time for 120 ms, TopN 20, isolation window of 1.6 m/z, scan range of 200 to 2000  
 175 m/z and dynamic exclusion of 30 s.  
 176

176

## 177 2.8. Proteome data analysis

178

179 Proteomic quantification was done using the Top-3 peptide area for approach followed by log<sub>2</sub>  
180 transformation. Transformed values were normalized manually by dividing the transformed values  
181 by the median of each sample. The ratio was further multiplied by the mean of the entire proteome  
182 data set (aerobic conditions separately from anaerobic conditions). Fold changes were calculated  
183 relative to benzoate-grown cells as described in section 2.6 (Table S3). Down-regulated proteins  
184 (negative values) indicate that the protein is more abundant in benzoate-grown cells than in toluene-  
185 grown cells. Contrary, up-regulated proteins indicate that the protein is more abundant in toluene-  
186 grown cells rather than in benzoate-grown cells. Since fold change of 2 was defined as the threshold,  
187 up-regulated proteins were defined by  $n \geq +1$  and down-regulated proteins were defined by  $n \leq -1$ .  
188 Student's T- test was the statistical method chosen to calculate significance between data. All T-test  
189 values below 0.05 were considered as statistically significant.

190

191

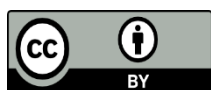

© 2020 by the authors. Submitted for possible open access publication under the terms and conditions of the Creative Commons Attribution (CC BY) license (<http://creativecommons.org/licenses/by/4.0/>).

192
